# Supplementary material
Source: publisher site journal article supplement (https://www.dovepress.com/article/412675)
Supplement: Supplementary file 1 [file get_supplementary_file.php]

**Supplementary Table 1.** Classification of the nutritional status.

| Classification | BMI | PHQ ≥ 10 | | PHQ < 10 | |
| --- | --- | --- | --- | --- | --- |
| n = 199 | % | n = 59 | % |
| Severe thinness | <16.00 | 7 | 3.52 | 2 | 3.39 |
| Moderate thinness | 16.00–16.99 | 17 | 8.54 | 3 | 5.08 |
| Mild thinness | 17.00–18.49 | 40 | 20.10 | 7 | 11.86 |
| Normal range | 18.50–24.99 | 130 | 65.33 | 42 | 71.19 |
| Overweight | ≥25.00 | 5 | 2.51 | 5 | 8.47 |
